# Supplementary material for: Microparticle alpha-2-macroglobulin enhances pro-resolving responses and promotes survival in sepsis
Source: PubMed Central journal article supplement (PMC3936490; doi:10.1002/emmm.201303503), 2013-12-16
Supplement: emmm0006-0027-sd3.pdf [file emmm0006-0027-sd3.pdf]

## Supporting Information Table of Contents

### Tables:

**Supporting Information Table 1:** Healthy volunteers and sepsis patients demographics.

**Supporting Information Table 2:** No significant difference in the incidence of co-morbidities between the two patient groups within 24h of admission to the intensive care unit.

**Supporting Information Table 3:** No significant difference in the medications received by the two patient groups prior to blood collection.

### Figures

**Supporting Information Figure 1.** Schematic elucidating microparticle A2MG enrichment.

**Supporting Information Figure 2.** A2MG-enriched microparticles modulate exudate cytokines levels and stimulate a pro-resolving lipid mediator phenotype.

**Supporting Information Figure 3.** A2MG does not display direct antibacterial actions.

**Supporting Information Figure 4.** A2MG-enriched microparticles enhanced monocyte/macrophage to neutrophil ratio

**Supporting Information Figure 5.** A2MG microvesicles reduce systemic and local pro-inflammatory cytokine levels

**Supporting Information Figure 6.** Reduced peripheral blood expression of LRP1 in mice treated with LRP1 shRNA.

**Supporting Information Figure 7.** LRP1 expression on human and murine neutrophils is regulated by LPS.

**Supporting Information Figure 8.** sA2MG enhances human macrophage bacterial phagocytosis and ROS production.

**Supporting Information Figure 9.** sA2MG enhances mouse macrophage bacterial phagocytosis.

**Supporting Information Figure 10.** sA2MG enhances human neutrophil bacterial phagocytosis and ROS production

**Supporting Information Figure 11.** sA2MG enhances cathelicidin release by human neutrophils.

**Supporting Information Figure 12.** A2MG MP do not alter adhesion molecule expression on TNF- $\alpha$ -stimulated HUVEC.

**Supporting Information Figure 13.** Microparticles-A2MG enhances neutrophil adhesion to activated HUVEC underflow.

**Supporting Information Figure 14.** A2MG regulates murine leukocyte responses to endotoxin.
