# Supplementary material for: Microparticle alpha-2-macroglobulin enhances pro-resolving responses and promotes survival in sepsis
Source: PubMed Central journal article supplement (PMC3936490; doi:10.1002/emmm.201303503), 2013-12-16
Supplement: emmm0006-0027-sd5.pdf [file emmm0006-0027-sd5.pdf]

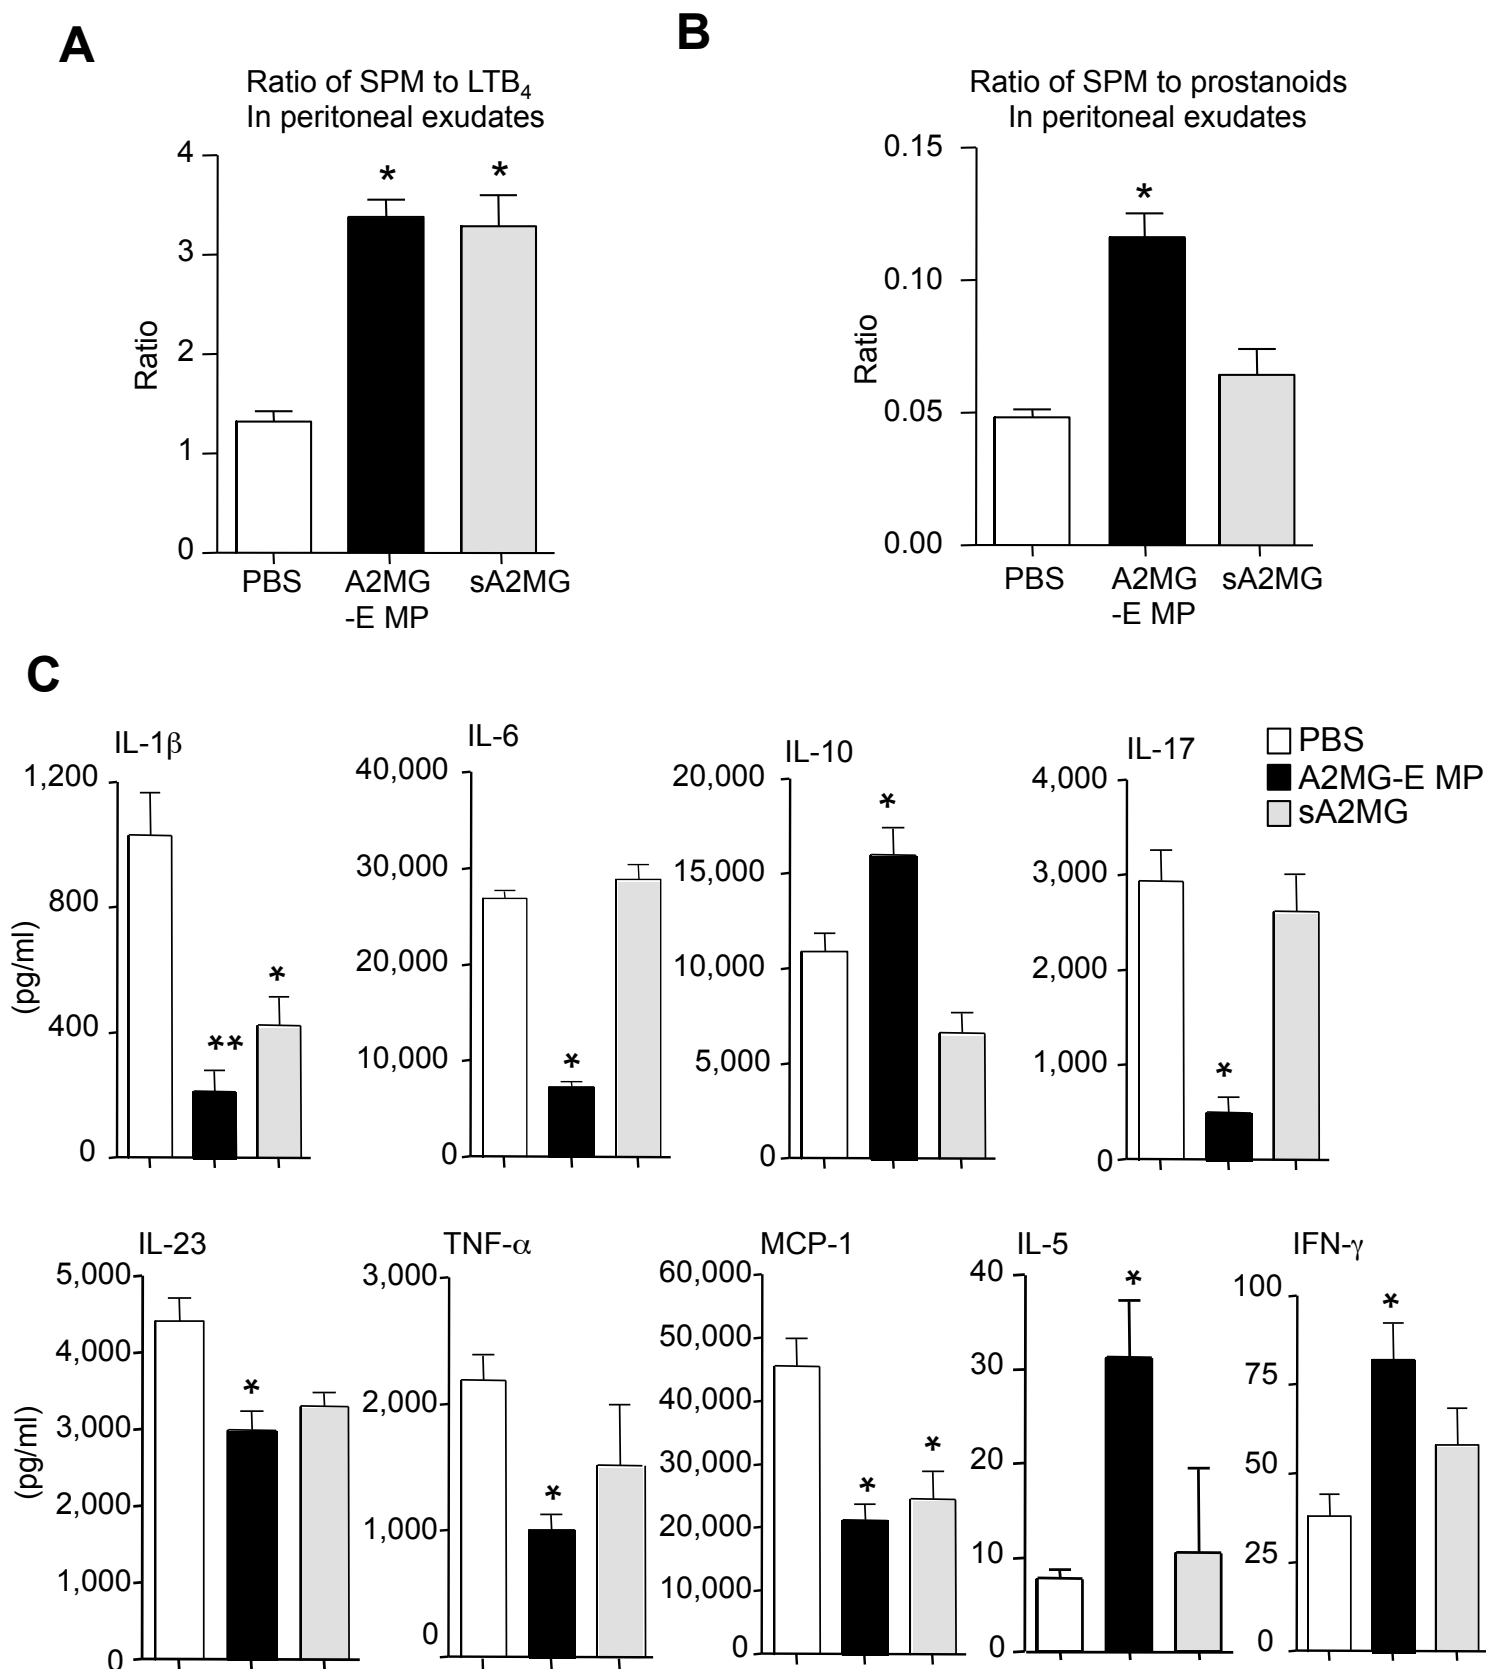

**Supporting Information Figure 2. A2MG-enriched microparticles modulate exudate cytokines levels and stimulate a pro-resolving lipid mediator phenotype.** Ratio of the total specialized pro-resolving mediators (SPM; RvD1, RvD2, RvD5 and PD1) to (A) leukotriene (LT)  $B_4$  and (B) prostanooids ( $PGE_2$ ,  $PGD_2$  and  $PGF_{2\alpha}$ ). (C) Exudate cytokine levels determined 12h after CLP by cytokine array. Results are mean  $\pm$  SEM of 6 mice per group. (\* $P < 0.05$  vs. PBS treated mice).
