# Supplementary material for: Microparticle alpha-2-macroglobulin enhances pro-resolving responses and promotes survival in sepsis
Source: PubMed Central journal article supplement (PMC3936490; doi:10.1002/emmm.201303503), 2013-12-16
Supplement: emmm0006-0027-sd6.pdf [file emmm0006-0027-sd6.pdf]

**A**

|                      |                |                  |
|----------------------|----------------|------------------|
| Ampicillin<br>(10µg) | sA2MG<br>(1µg) | sA2MG<br>(100ng) |
| sA2MG<br>(10ng)      | sA2MG<br>(1ng) | Vehicle          |

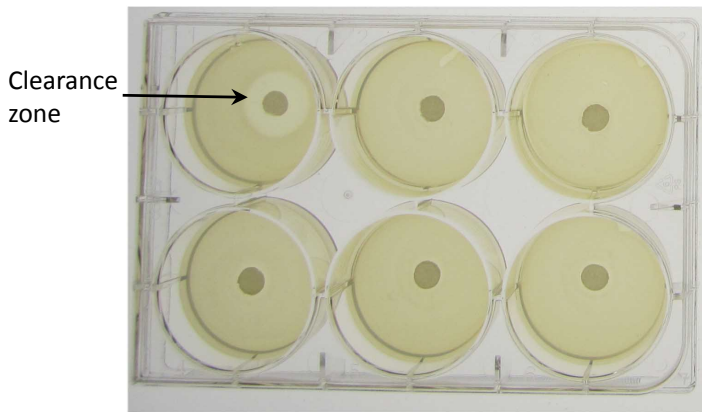**B**

|                      |                |                  |
|----------------------|----------------|------------------|
| Ampicillin<br>(10µg) | sA2MG<br>(1µg) | sA2MG<br>(100ng) |
| sA2MG<br>(10ng)      | sA2MG<br>(1ng) | Vehicle          |

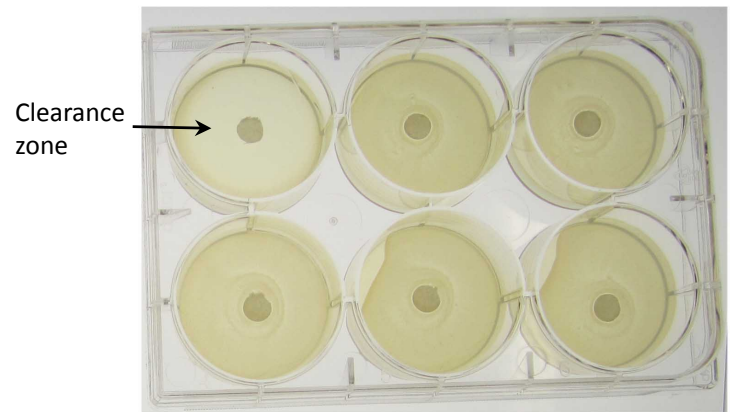

**Supporting Information Figure 3. A2MG does not display direct antibacterial actions.** 10 µg of ampicillin (as a positive control), sA2MG (1ng-1µg) or vehicle were each placed on LB agar plates containing **(A)** *E. coli* ( $1.7 \times 10^7$  CFU) or **(B)** *S. aureus* ( $1.7 \times 10^7$  CFU). The zone of clearance was assessed after overnight incubation at 37°C. Photographs represent n=3.
