# Supplementary material for: Microparticle alpha-2-macroglobulin enhances pro-resolving responses and promotes survival in sepsis
Source: PubMed Central journal article supplement (PMC3936490; doi:10.1002/emmm.201303503), 2013-12-16
Supplement: emmm0006-0027-sd10.pdf [file emmm0006-0027-sd10.pdf]

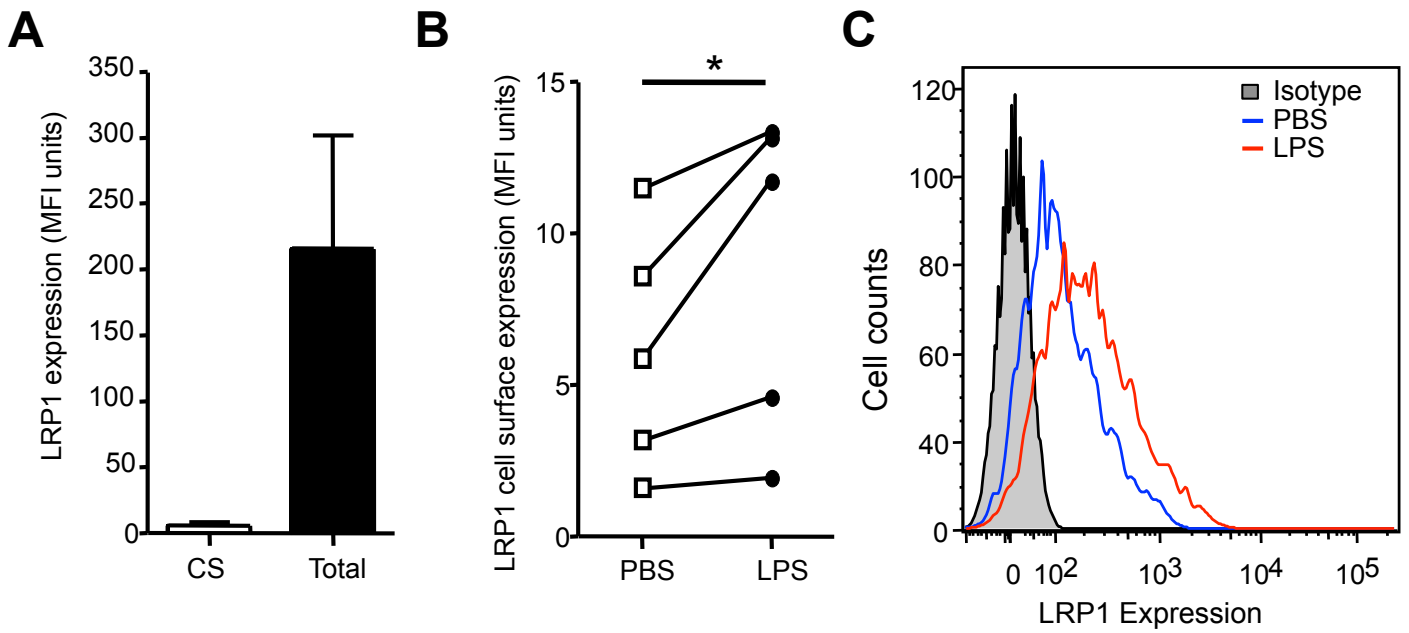

**Supporting Information Figure 7. LRP1 expression on human and murine neutrophils is regulated by LPS.** (A) LRP1 cell surface (CS) and Total (Fixed and permeabilized cell) expression in resting peripheral blood neutrophils. (B) LRP1 cell surface expression on PBS and LPS (1 $\mu$ g/ml, 30min 37 $^{\circ}$ C) treated human peripheral blood neutrophils. Results are mean  $\pm$  SEM. . n = 5 distinct cell preparations. (\*P<0.05 vs PBS incubated neutrophils by paired student t-Test). (C) Flow-cytometric assessment of murine peripheral blood neutrophils for LRP1 expression with or without LPS (1 $\mu$ g/ml, 60min, 37 $^{\circ}$ C). Results are representative of 3 distinct mouse neutrophil preparations.
