# Supplementary material for: Microparticle alpha-2-macroglobulin enhances pro-resolving responses and promotes survival in sepsis
Source: PubMed Central journal article supplement (PMC3936490; doi:10.1002/emmm.201303503), 2013-12-16
Supplement: emmm0006-0027-sd12.pdf [file emmm0006-0027-sd12.pdf]

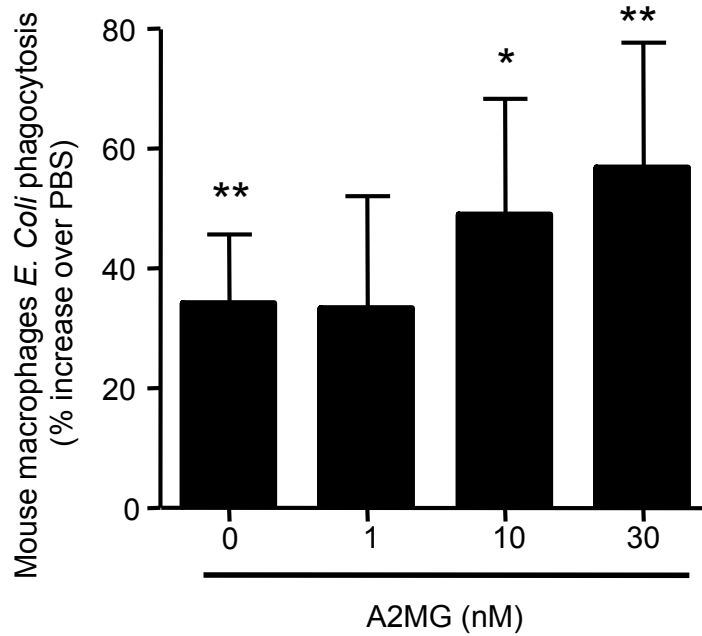

**Supporting Information Figure 9. sA2MG enhances mouse macrophage bacterial phagocytosis.** Mouse primary macrophages were plated in 96 well plates and incubated with either PBS or A2MG at the indicated concentrations (37°C, 24h) prior to the addition of BacLight labeled E.coli ( $5 \times 10^5$ /well) for 60 min (37°C). The extent of phagocytosis was determined by measuring total fluorescence (Ex 495/Em535 nm) using a fluorescent plate reader. Results are mean  $\pm$  SEM of 5 individual cell preparations (\* $P < 0.05$ , \*\* $P < 0.01$  vs. PBS incubation by one way ANOVA)
