# Supplementary material for: Microparticle alpha-2-macroglobulin enhances pro-resolving responses and promotes survival in sepsis
Source: PubMed Central journal article supplement (PMC3936490; doi:10.1002/emmm.201303503), 2013-12-16
Supplement: emmm0006-0027-sd13.pdf [file emmm0006-0027-sd13.pdf]

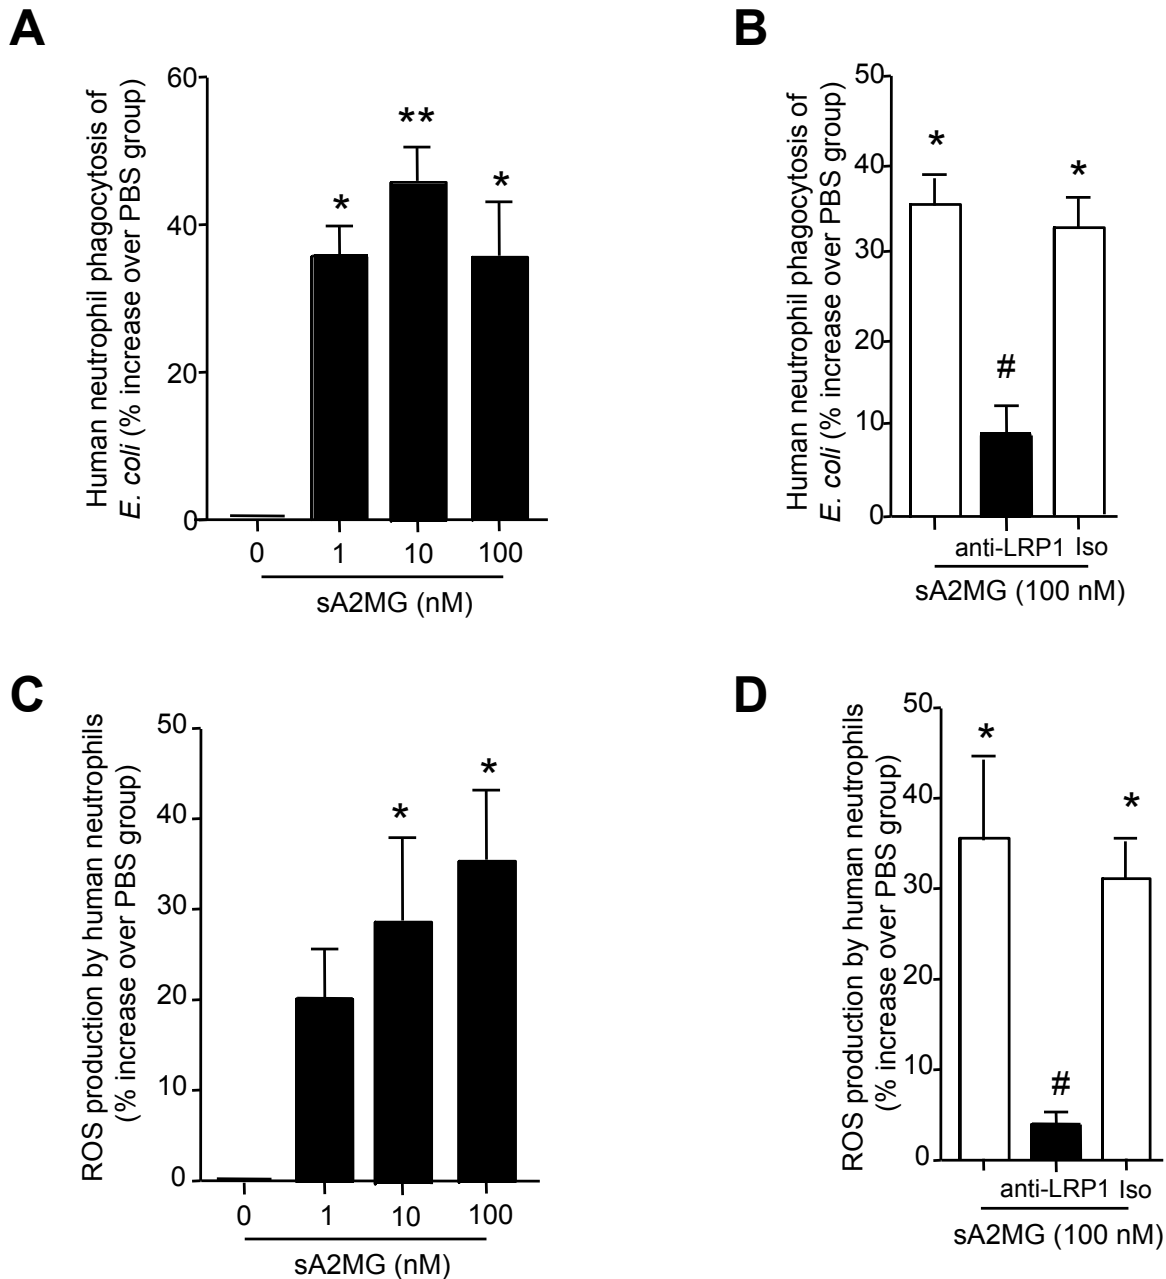

**Supporting Information Figure 10. sA2MG enhances human neutrophil bacterial phagocytosis and ROS production.** (A) Peripheral blood human neutrophils ( $1 \times 10^5$ /well) were plated in 96 well plates and incubated with PBS or sA2MG (1-100nM) microparticles per well) 15 min prior to the addition of BacLight labeled *E. coli* ( $5 \times 10^6$ /well) for 60 min ( $37^\circ\text{C}$ ). In some instances anti-LRP1 ( $1 \mu\text{g/ml}$ ) antibody was added 30min prior to the addition of A2MG (right panel). (C) Peripheral blood human neutrophils ( $1 \times 10^5$ /well) were incubated CM- $\text{H}_2\text{DCFDA}$  for 30 min prior to plating in 96 well plates. These were then incubated with PBS or sA2MG (1-100nM) 15 min prior to the addition of *E. coli* ( $5 \times 10^6$ /well) for 30 min ( $37^\circ\text{C}$ ) and intracellular ROS production was determined on a plate reader. In some instances anti-LRP1 ( $1 \mu\text{g/ml}$ ) antibody was added 30min prior to the addition of sA2MG (right panel). Results are mean  $\pm$  SEM of 3 individual cell preparations (\* $P < 0.05$ , \*\* $P < 0.01$  vs. PBS incubation; #  $P < 0.05$  vs sA2MG incubation by one way ANOVA)
