# Supplementary material for: Microparticle alpha-2-macroglobulin enhances pro-resolving responses and promotes survival in sepsis
Source: PubMed Central journal article supplement (PMC3936490; doi:10.1002/emmm.201303503), 2013-12-16
Supplement: emmm0006-0027-sd14.pdf [file emmm0006-0027-sd14.pdf]

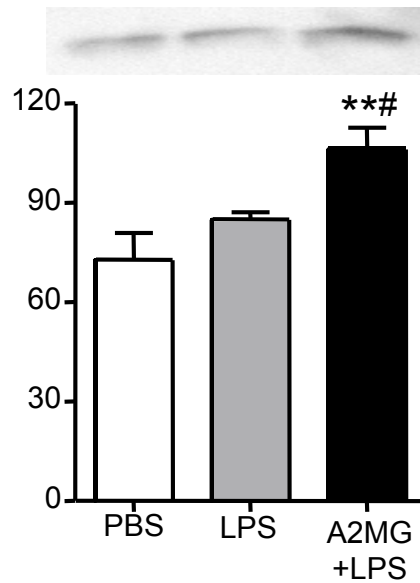

**Supporting Information Figure 11. sA2MG enhances cathelicidin release by human neutrophils.** Peripheral blood human neutrophils ( $3 \times 10^7/\text{ml}$ ) were incubated with cytochalasin B (5min,  $37^\circ\text{C}$  pH 7.45), then the cells were incubated for a further 30min with PBS, LPS ( $1\mu\text{g}/\text{ml}$ ) or LPS ( $1\mu\text{g}/\text{ml}$ ) and A2MG (10nM). Cells were then centrifuged, supernatants collected and cathelicidin levels in these supernatants were assessed by western blotting. Inset top is a representative blot. Results are mean  $\pm$  SEM.  $n=3$  neutrophil preparations. (\*\* $P < 0.05$  vs PBS neutrophils; # $P < 0.05$  vs LPS neutrophils by One Way Anova.)
