# Supplementary material for: Microparticle alpha-2-macroglobulin enhances pro-resolving responses and promotes survival in sepsis
Source: PubMed Central journal article supplement (PMC3936490; doi:10.1002/emmm.201303503), 2013-12-16
Supplement: emmm0006-0027-sd15.pdf [file emmm0006-0027-sd15.pdf]

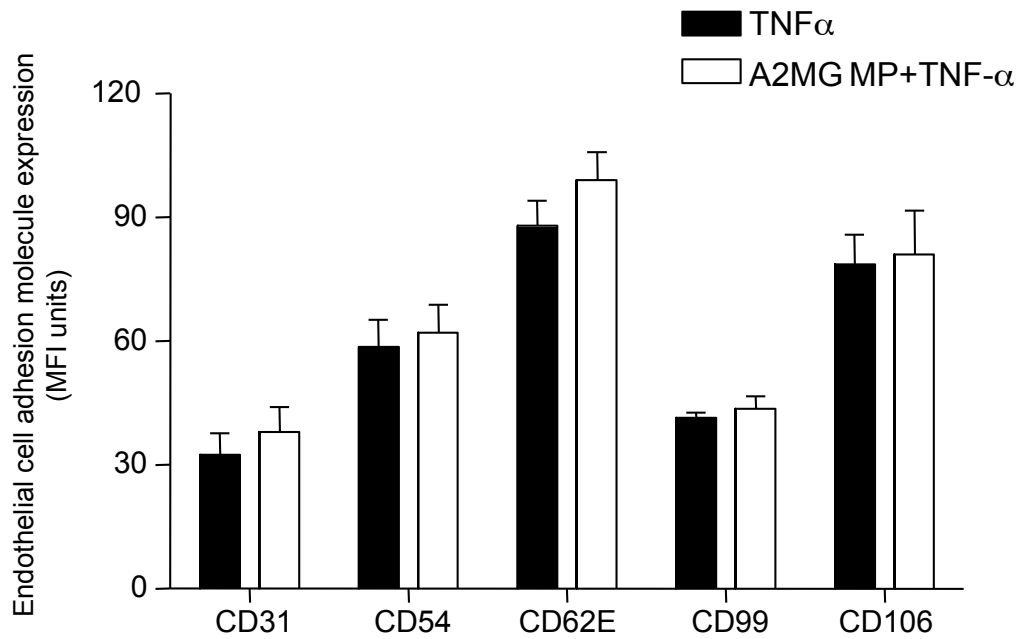

**Supporting Information Figure 12. A2MG MP do not alter adhesion molecule expression on TNF- $\alpha$ -stimulated HUVEC.** HUVEC were incubated for 4h with buffer, TNF- $\alpha$  (10ng/ml) or TNF- $\alpha$  and A2MG MP ( $8 \times 10^5/9.6\text{cm}^2$  well). Subsequently, cells were detached and cell-surface expression for the indicated adhesion molecules was assessed after incubation with fluorescently conjugated antibodies by flow cytometry. Results are mean  $\pm$  SEM. n=3 distinct HUVEC and MP preparations.
