# Supplementary material for: Microparticle alpha-2-macroglobulin enhances pro-resolving responses and promotes survival in sepsis
Source: PubMed Central journal article supplement (PMC3936490; doi:10.1002/emmm.201303503), 2013-12-16
Supplement: emmm0006-0027-sd16.pdf [file emmm0006-0027-sd16.pdf]

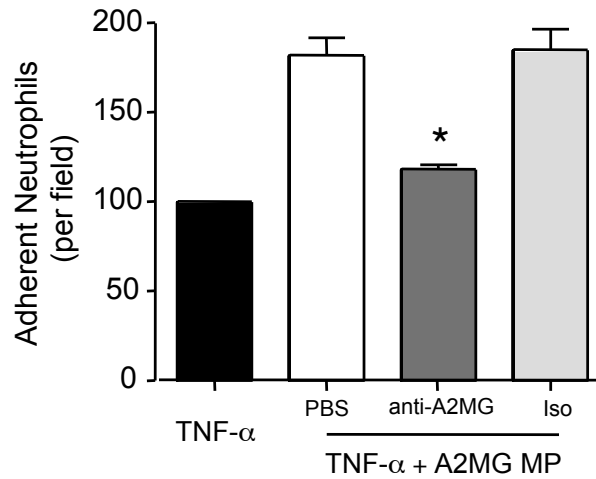

**Supporting Information Figure 13. Microparticles-A2MG enhances neutrophil adhesion to activated HUVEC underflow.** HUVEC incubated with TNF- $\alpha$  and A2MG MP ( $5 \times 10^4/0.6 \text{cm}^2$ ) for 4h then incubated for the last 15 min with anti-A2MG antibody or relevant isotype control, prior to perfusion with freshly prepared neutrophils at  $1 \text{dyne/cm}^2$  for 8min, and the number of adherent cells quantified. Results are mean  $\pm$  SEM.  $n=6$  individual cell and microparticle preparations (\* $P < 0.05$  vs. Isotype control antibody incubation).
