# Supplementary material for: Microparticle alpha-2-macroglobulin enhances pro-resolving responses and promotes survival in sepsis
Source: PubMed Central journal article supplement (PMC3936490; doi:10.1002/emmm.201303503), 2013-12-16
Supplement: emmm0006-0027-sd17.pdf [file emmm0006-0027-sd17.pdf]

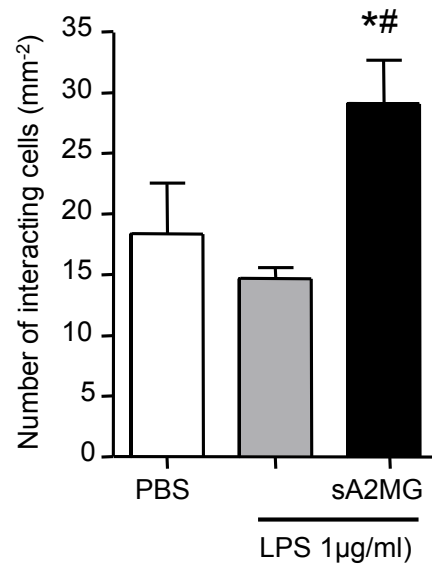

**Supporting Information Figure 14. A2MG regulates murine leukocyte responses to endotoxin.** Mouse neutrophil interaction with ICAM-1 coated chambers following incubation with LPS (1µg/ml, 60min, 37°C) or A2MG (10nM, 15min, 37°C) followed by LPS (1µg/ml, 60min, 37°C) under flow.
