# Supplementary material for: Microparticle alpha-2-macroglobulin enhances pro-resolving responses and promotes survival in sepsis
Source: PubMed Central journal article supplement (PMC3936490; doi:10.1002/emmm.201303503), 2013-12-16
Supplement: emmm0006-0027-sd18.pdf [file emmm0006-0027-sd18.pdf]

# A

**Supporting Information Table 1: Healthy volunteers and sepsis patients demographics.**

| Sample                            | PMN counts (10 <sup>6</sup> per ml) | Age (years) | Male/Female | Total microparticle count (x10 <sup>8</sup> /ml) |
|-----------------------------------|-------------------------------------|-------------|-------------|--------------------------------------------------|
| Healthy Volunteer (HV) Plasma     | 6.7 ± 1.6                           | 41 ± 4      | 7/9         | 14.5 ± 0.7                                       |
| Sepsis Survivors (SS) Plasma      | 11.0 ± 1.2                          | 65 ± 4      | 9/16        | 16.0 ± 2.0                                       |
| Sepsis Non-Survivors (SNS) Plasma | 13.2 ± 1.1                          | 63 ± 4      | 16/9        | 15.5 ± 1.6                                       |

<sup>a</sup>Results are mean ± SEM. n=15 for HV and n=25 for sepsis patients.
