# Supplementary material for: Microparticle alpha-2-macroglobulin enhances pro-resolving responses and promotes survival in sepsis
Source: PubMed Central journal article supplement (PMC3936490; doi:10.1002/emmm.201303503), 2013-12-16
Supplement: emmm0006-0027-sd19.pdf [file emmm0006-0027-sd19.pdf]

**Supporting Information Table 2: No significant difference in the incidence of co-morbidities between the two patient groups within 24h of admission to the intensive care unit.**

| Disease                     | Sepsis Survivors | Sepsis Non Survivors |
|-----------------------------|------------------|----------------------|
| Heart/Vascular Disease      | 9/25             | 8/25                 |
| Respiratory Disease         | 10/25            | 11/25                |
| Neurological Disease        | 0/25             | 4/25                 |
| Gastro Intestinal Disease   | 3/25             | 5/25                 |
| Cancer                      | 5/25             | 2/25                 |
| Diabetes/ Endocrine Disease | 1/25             | 4/25                 |
