# Supplementary material for: Microparticle alpha-2-macroglobulin enhances pro-resolving responses and promotes survival in sepsis
Source: PubMed Central journal article supplement (PMC3936490; doi:10.1002/emmm.201303503), 2013-12-16
Supplement: emmm0006-0027-sd20.pdf [file emmm0006-0027-sd20.pdf]

**Supporting Information Table 3: No significant difference in the medications received by the two patient groups prior to blood collection.**

| Treatment           | Sepsis Survivors | Sepsis Non Survivors |
|---------------------|------------------|----------------------|
| Activated Protein C | 2/25             | 1/25                 |
| Corticosteroids     | 2/25             | 3/25                 |
| Antibiotics         | 25/25            | 25/25                |
| Other               | 0/25             | 0/25                 |
